# Supplementary material for: A cross-linkable phthalonitrile derivative as a precursor to synthesize nitrogen-doped carbon nanodots for Ni ion detection
Source: Royal Society of Chemistry journal article supplement (doi:10.1039/d3nj03723a), 2023-01-01
Supplement: d3nj03723a1.pdf [file d3nj03723a1.pdf]

**Cross-linkable phthalonitrile derivative as precursor to synthesize  
nitrogen doped carbon nanodots for Ni ions detection**

Zilin Fan<sup>1</sup>, Qimeng Ran<sup>1</sup>, Xiaoling Xu<sup>1</sup>, Yin Tang<sup>2</sup>, Xiaobo Liu<sup>1,2</sup>, Kun Jia<sup>\*1,2,3</sup>

1. School of Materials and Energy, University of Electronic Science and Technology of China, 610054, Chengdu, China.

2. Sichuan Province Engineering Technology Research Center of Novel CN Polymeric Materials, Chengdu, China.

3. Institute of Electronic and Information Engineering of UESTC in Guangdong, 523808, Dongguan, China.

\*Corresponding Author. E-mail address: [jiakun@uestc.edu.cn](mailto:jiakun@uestc.edu.cn)

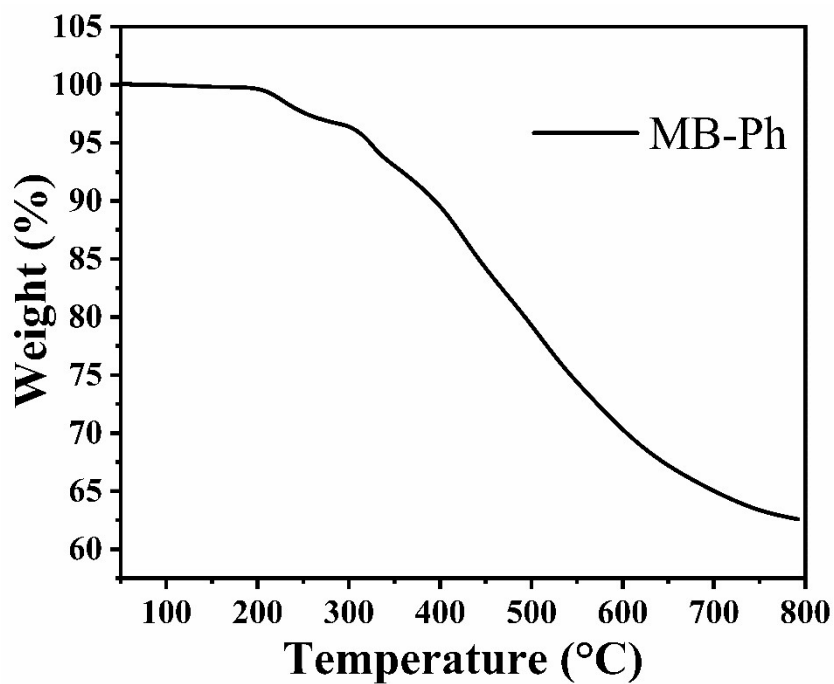

Fig.S1 The TGA curve of MB-Ph precursor.

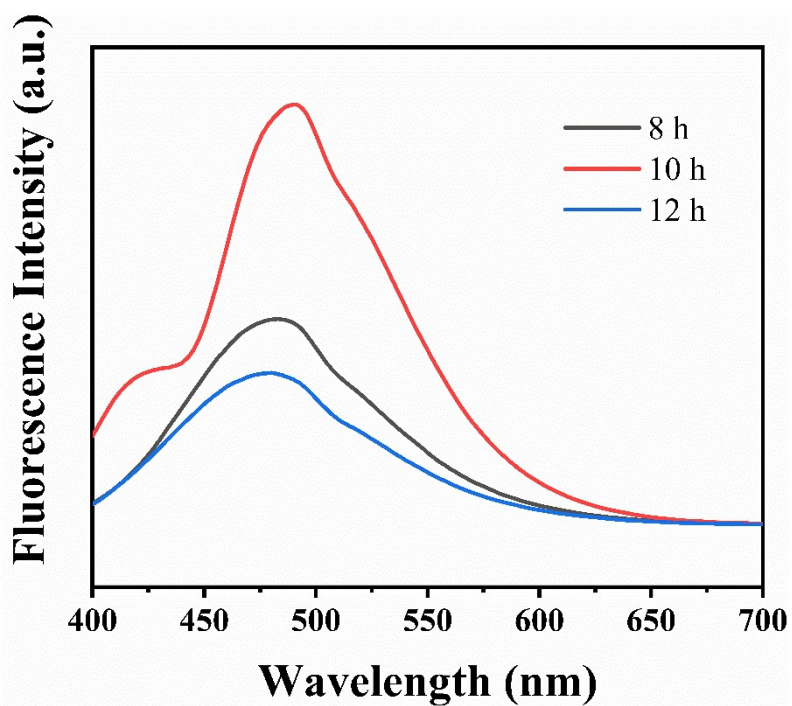

Fig.S2 The fluorescence emission curves of N-CDs synthesized for different time.

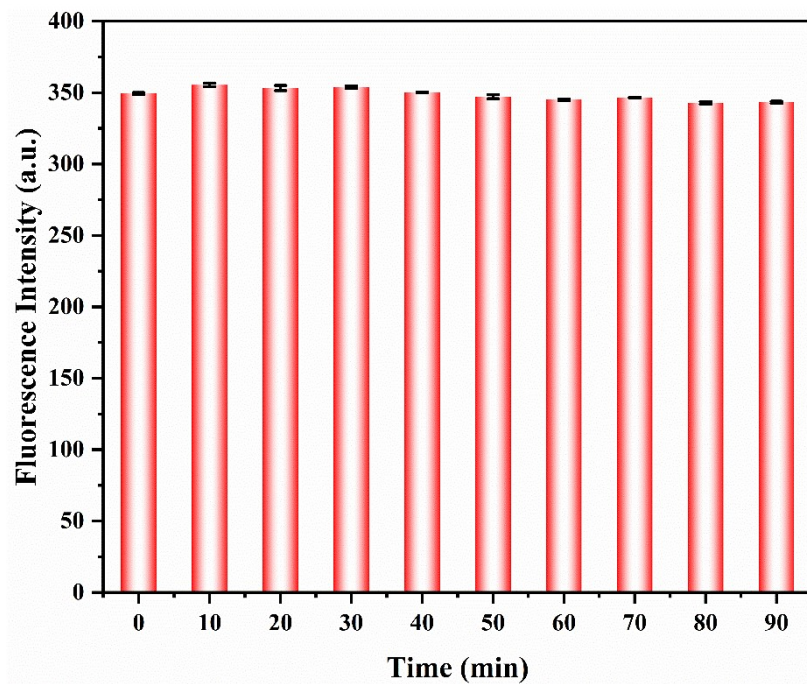

**Fig.S3** Effect of UV light irradiation time on the fluorescence intensity of the optimized N-CDs.

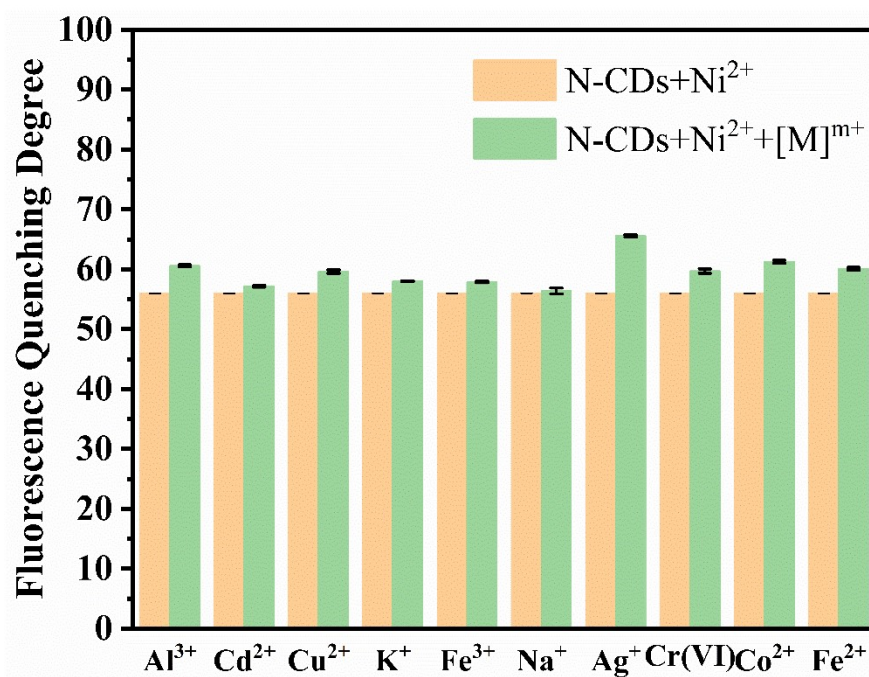

**Fig.S4** The effect of Ni<sup>2+</sup> alone or its mixtures with other metal ions on the fluorescence quenching of N-CD.

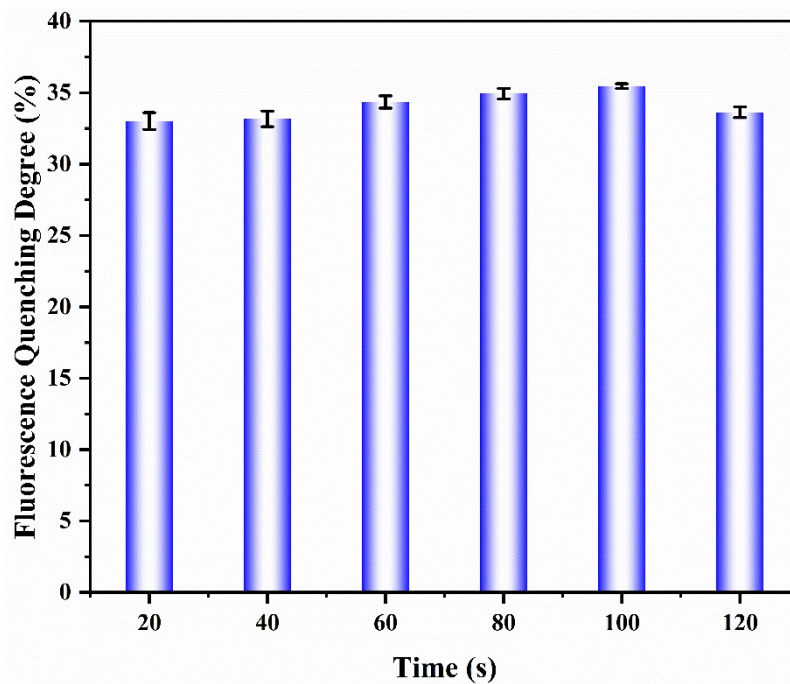

Fig.S5 Fluorescent quenching degree of N-CDs by Ni(II) upon different incubation time.

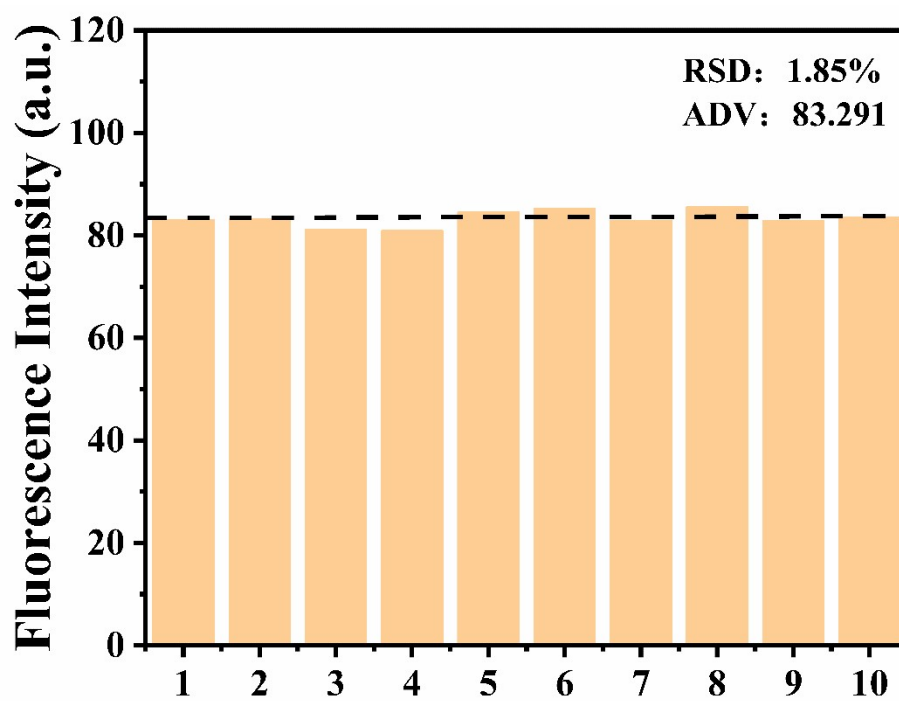

Fig.S6 Fluorescence spectrogram of Ni(II) for repeated detection of N-CDs.

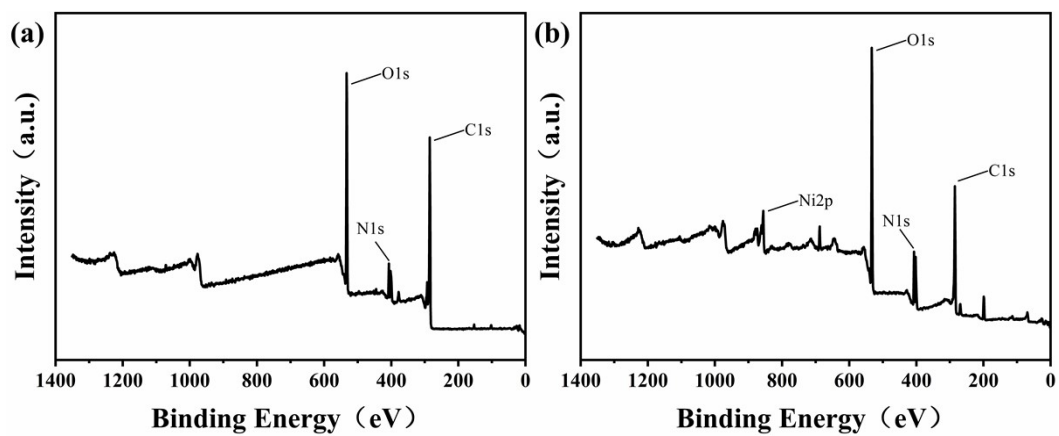

Fig.S7 XPS spectrum of the pristine N-CDs (a) and N-CDs after interacted with Ni(II) (b).
